# Supplementary material for: A RecA-mediated exon profiling method
Source: PubMed Central journal article supplement — Nucleic Acids Res. 2006 Aug 8;34(13):e97. doi: 10.1093/nar/gkl497 (PMC1540731; doi:10.1093/nar/gkl497), 2006-08-08
Supplement: nar_34_13_e97__1.pdf [file nar_34_13_e97__1.pdf]

### Supplementary Table 1

#### Primers for pUC19 control experiment

| Primer names | Sequences                                                |
|--------------|----------------------------------------------------------|
| pUC19-50     | 5'-TACGCCAGCTGGCGAAAGGGGGATGTGCTGCAAGGCGATTAAGTTGGGTA-3' |
| pUC19-40     | 5'-GGCGAAAGGGGGATGTGCTGCAAGGCGATTAAGTTGGGTA-3'           |
| pUC19-30     | 5'-GGATGTGCTGCAAGGCGATTAAGTTGGGTA-3'                     |
| pUC19-20     | 5'-CAAGGCGATTAAGTTGGGTA-3'                               |
| pUC19-10     | 5'-AAGTTGGGTA-3'                                         |

  

| Primer names | Sequences                                                |
|--------------|----------------------------------------------------------|
| pUC19NC-50   | 5'-ATGTGCGTCGGAACCAGCCTACGAGTTGTCTGGCGTCTGCGACCCTGTGC-3' |
| pUC19NC-40   | 5'-GAACCAGCCTACGAGTTGTCTGGCGTCTGCGACCCTGTGC-3'           |
| pUC19NC-30   | 5'-ACGAGTTGTCTGGCGTCTGCGACCCTGTGC-3'                     |
| pUC19NC-20   | 5'-TGGCGTCTGCGACCCTGTGC-3'                               |
| pUC19NC-10   | 5'- GACCCTGTGC-3'                                        |

### Supplementary Table 2

Tissues (Mouse strain: C57BL/6J if it is not stated)

|                                |
|--------------------------------|
| Aorta and vein                 |
| Vagina                         |
| Pituitary gland (total RNA)    |
| Tg197 WHJ/whole joints         |
| Tg197 SFs Synovial fibroblasts |
| Adipose                        |
| Diencephalon                   |
| Hippocampus                    |
| Cerebellum                     |
| Placenta                       |
| Tongue                         |
| Embryo13-head                  |

|                                                 |
|-------------------------------------------------|
| Stomach                                         |
| Spleen Th2 CD4+Tcell                            |
| Mix 15 days embryo whole body                   |
| 18-day embryo                                   |
| Testis (embryo15)                               |
| Embryo12-head                                   |
| Melanocyte                                      |
| (B6)N2 Thymic cells                             |
| N0 kidney                                       |
| Skin (Neonate 0 day)                            |
| Embryo17-Head                                   |
| N0 eyeball                                      |
| Embryo16 Head                                   |
| E13 lung                                        |
| L10 mammary gland                               |
| Male adult lung                                 |
| Female 10 days pregnant, adult ovary and uterus |
| Mix mammary gland                               |
| E13 heart                                       |
| Male adult gall bladder                         |
| N10 Olfactory brain                             |
| Mix 10 days neonate heart                       |
| Mix 13 days embryo brain                        |
| ES cells                                        |
| Embryo10                                        |
| Adult inner ear                                 |
| Ovary (embryo 12)                               |
| Stroma cell                                     |
| Mix 12 days embryo whole body                   |
| B6-derived CD11 +ve dendritic cells             |
| N0 Cerebellum                                   |
| Colon                                           |
| Small intestine                                 |

|                                               |
|-----------------------------------------------|
| <b>Eyeball (adult)</b>                        |
| <b>Bone</b>                                   |
| <b>Urinary bladder</b>                        |
| <b>Spinal cord</b>                            |
| <b>Mix 13 days embryo whole body</b>          |
| <b>Male adult spleen</b>                      |
| <b>Medulla oblongata</b>                      |
| <b>Cecum</b>                                  |
| <b>Male 16 days neonate diencephalon</b>      |
| <b>Lung (embryo16)</b>                        |
| <b>Male adult brain</b>                       |
| <b>Liver</b>                                  |
| <b>Ovary &amp; Uterus (Preg.11day)</b>        |
| <b>Pancreas</b>                               |
| <b>Male adult kidney</b>                      |
| <b>Mix 17 days embryo kidney</b>              |
| <b>C.quadrigemina</b>                         |
| <b>Female 11 days pregnant adult placenta</b> |
| <b>Testis (embryo 13)</b>                     |
| <b>N16 heart</b>                              |
| <b>E12 eyeball</b>                            |

Supplementary Table 3

Primer list : Thioredoxin domain containing 5

| Primer names | Sequences                             |
|--------------|---------------------------------------|
| Txndc5-1     | 5'-CAAGCACCTGTATACGGCCGACATGTTCAC-3'  |
| Txndc5-2     | 5'-GCAAAGGCGCCCGGGCCCAGGAGGTGGAAG-3'  |
| Txndc5-3     | 5'-CAAGCACCTGTATACGGCCGACATGTTCAC-3'  |
| Txndc5-4     | 5'-GAGCTTGTGTTGCTTCCTGTGTGCTCTCTG-3'  |
| Txndc5-5     | 5'-CTGTTGACTTAGTAAGGTGTCGGTCCATAG-3'  |
| Txndc5-6     | 5'-GTGGAGTGTGGAGATGTACGTC'TTCTGCAG-3' |
| Txndc5-7     | 5'-CTGACCATCTCTCTAATGATTGAGCAGTGG-3'  |
| Txndc5-8     | 5'-GCTCACAGTGGCTTCAGCTTAGCATCATGG-3'  |
| Txndc5-9     | 5'-GACAAGTACAACAGCATGGAGGATGCCAAG-3'  |
| Txndc5-10    | 5'-CAGTGAAGTACCAGGGTCCTAGAGACTTTG-3'  |
| Txndc5-11    | 5'-GGTTGTATGAGCTCTCGGCCAACAACTTTG-3'  |
| Txndc5-12    | 5'-CAACCACTTTATCAAGTTCTTCGCTCCGTG-3'  |
| Txndc5-13    | 5'-CTCAGAGCATCAGGTCAGAGGCTATCCAAC-3'  |
| Txndc5-14    | 5'-GACTTGGAGTCACTGAGAGACTATGTGCAG-3'  |
| Txndc5-15    | 5'-GATAACCTTCGTCAAGTTCTATGCTCCGTG-3'  |
| Txndc5-16    | 5'-GTGTGGCCACTGTAAGAATCTGGCTCCTAC-3'  |

Supplementary Table 4

Primer list : Interleukin 1  $\beta$

| Primer names | Sequences                            |
|--------------|--------------------------------------|
| II1b-1       | 5'-GATCCTCTCCAGCCAAGCTTCCTTGTGCAA-3' |
| II1b-2       | 5'-AAAGAATCTATACCTGTCCTGTGTAATGAA-3' |
| II1b-3       | 5'-CTCCATGAGCTTTGTACAAGGAGAACCAAG-3' |
| II1b-4       | 5'-AAACAACAGTGGTCAGGACATAATTGACTT-3' |
| II1b-5       | 5'-AGTGTGGATCCCAAGCAATACCCAAAGAAG-3' |
| II1b-6       | 5'-CAAACCCTGCAGTGGTTCGAGGCCTAATAG-3' |
| II1b-7       | 5'-TGGATGCCACCCACTTTCTTTCTTCACAC-3'  |
| II1b-8       | 5'-ATGAGCACCTTCTTTTCCTTCATCTTTGAA-3' |
| II1b-9       | 5'-CATCAACAAGAGCTTCAGGCAGGCAGTATC-3' |
| II1b-10      | 5'-CTTAATGAGGACTGAGAGCAGACAGCAGAC-3' |
| II1b-11      | 5'-CACCTCAATGGACAGAATATCAACCAACAA-3' |
| II1b-12      | 5'-GATGATGATGATAACCTGCTGGTGTGTGAC-3' |
| II1b-13      | 5'-TGAATGAAGCACCAGCACATTGCTTTGATG-3' |
| II1b-14      | 5'-GGTCACAAGAAACCATGGCACATTCTGTTC-3' |

Supplementary Table 5

Primer list: Interleukin 1 family 6

| Primer names | Sequences                             |
|--------------|---------------------------------------|
| Il1f6-1      | 5'-GGTGTAGTTCTGTAGTGTGCAGACACATTC-3'  |
| Il1f6-2      | 5'-GTTGTGGATAAAAAGGCTTGGACCTTAGTAG-3' |
| Il1f6-3      | 5'-TGGCAGCTCAGAAACAACATCACCATAATG-3'  |
| Il1f6-4      | 5'-CATCACCTTCGCTTAGACATGTTTCAGGATC-3' |
| Il1f6-5      | 5'-CCAATATCTGGACACTCTTGAGACGAACAG-3'  |
| Il1f6-6      | 5'-CGATGAGCTGCCTGTTCTGCACAAAGGATG-3'  |
| Il1f6-7      | 5'-GAGTGGTACAACCTCTACATTTGAGTCTGC-3'  |
| Il1f6-8      | 5'-TCTTCATCACTGACTTCGAGATGATTGTGG-3'  |
| Il1f6-9      | 5'-GGTTTTTAGACACATTGCTCTGTGGCACTC-3'  |
| Il1f6-10     | 5'-TCCAAAGCATTACTGTTGGTTTTTACAAG-3'   |
| Il1f6-11     | 5'-GGTGGTGAATCAGATGCAGAACATCTTAC-3'   |
| Il1f6-12     | 5'-GAATCTCTTGCTGCTTGGCTCTGACCTTGG-3'  |
| Il1f6-13     | 5'-TGCATGGATAATTTAGAAGAGAGGGCAGTC-3'  |
| Il1f6-14     | 5'-TCTTGATTTATTTCAATGAGCAGTCATAGG-3'  |

Supplementary Table 6

Primer list: glutamine-rich hypothetical protein

| Primer names | Sequences                             |
|--------------|---------------------------------------|
| gr1          | 5'-CGCCTGCGCGTCCCCCGCTGAGTGGGGTTG-3'  |
| gr2          | 5'-CGGCTGGAGCTGAGAGTCCCCTGCTCCTTC-3'  |
| gr3          | 5'-GACTAGCTTCGTACACGCAACCTTGCATC-3'   |
| gr4          | 5'-GGATAACCAGCATCCGAGATCATCAAGTCAG-3' |
| gr5          | 5'-CGTCCACGCTGTGCATTGTAATGTCTTCAC-3'  |
| gr6          | 5'-ATTCTCTGTCTTGGGTGAACTTGAGATGGG-3'  |
| gr7          | 5'-GGACAGACTGTGTGGTGGTAAGATGATTGG-3'  |
| gr8          | 5'-CCTTTGCCTCTTGCCTCTATAGAACAATTC-3'  |
| gr9          | 5'-CGGTTGCCATGGCAACAGACACAATGGTTC-3'  |
| gr10         | 5'-AAGGGATGGGGAGAGGAGGAGAATGTCAAC-3'  |
| gr11         | 5'-CAAGAAGGCTTGTTTCAGACTAGCTCTGAGC-3' |
| gr12         | 5'-CCATATGGTGTGCAAGTGTGTGTTGGTGAG-3'  |
| gr13         | 5'-GATGTGGAGTGCATAGCACAGAAGCTGGAG-3'  |
| gr14         | 5'-GAGGAGAGAGAACAGAGAACGTTAGGTGAG-3'  |
| gr15         | 5'-TCGAGGTTAGCTGTCATAATTCCCAGTTAC-3'  |
| gr16         | 5'-GAGAATGCCCGACTGGAAATAGAAAAACTG-3'  |
| gr17         | 5'-GTACCACCTCTACAGCCACTGCCACACTTG-3'  |
| gr18         | 5'-GTACAACTGACCTACAGAGAGCAAGGGAGC-3'  |
| gr19         | 5'-GTCTAAGTTGGTCCTTGAGAACTGATTCTG-3'  |
| gr20         | 5'-ACAACCTGACCACAAAGTGTTTGCTTGGAAG-3' |
| gr21         | 5'-CCTTTTCAGTGTGTCGGCTCTCCTTGCTTG-3'  |
| gr22         | 5'-CCTCTTCAATCCATCGCTGCTGACTGACAG-3'  |
| gr23         | 5'-AAGAGACAATTAAAGTACAATATTTTAATG-3'  |
| gr24         | 5'-GTGTTGGAGAGTGACTTGTGAGAAGAGAGG-3'  |
| gr25         | 5'-CAAGGGCTGAGGGCAGAGAGCAATTTTLAG-3'  |
| gr26         | 5'-GAAGATCTGACTGAGCACAGTAACTAGAGG-3'  |
| gr27         | 5'-GCTCTTCTCTGTGGAATCTCTCTCCATGTC-3'  |

---

|      |                                        |
|------|----------------------------------------|
| gr28 | 5'-CATTCAACATTAGCCATTTGTCCACTGGGC-3'   |
| gr29 | 5'-CCTCAAGCCTGTCTCCATCCTTATCCATAC-3'   |
| gr30 | 5'-AAGTTTCTTATAACAACGTTACAACCTTGAGC-3' |
| gr31 | 5'-AATTCATTGCATGGGAAACCCAAGGCTTAG-3'   |
| gr32 | 5'-CTGTGTGTGTGTGTGTGTGTGCTGTTCTTCAC-3' |
| gr33 | 5'-CTCTCTCAAGCGCCTTTCTCTCTTACAATG-3'   |
| gr34 | 5'-CAACATAACAGTTTGCTCCAGGAGGAGAAC-3'   |
| gr35 | 5'-ATTGAACTCAAGCAGGCCAGGAGAAGTTG-3'    |
| gr36 | 5'-CGGAAGACAAGTCTGCCTCTCAGATGTTTG-3'   |
| gr37 | 5'-TTTTTCTTATATGAGTTTCCATCATCTCC-3'    |
| gr38 | 5'-CCTCTGCTGTCCTTTTAATATCTGTGGGAC-3'   |
| gr39 | 5'-CAGACACAAGTGAGAGCCTTGCAGGATAAG-3'   |
| gr40 | 5'-CCACTCCTGCTATTCAGCCAATTATCACTG-3'   |
| gr41 | 5'-GGATTCAATTCCAGGCACCTACAATGTAGC-3'   |
| gr42 | 5'-GGTCAGTGACACTACATTATTCTTGAGGCG-3'   |
| gr43 | 5'-CGGTTTTTGGAGCAACTTGGTGATCATGTG-3'   |
| gr44 | 5'-GTCAAGGACCGTCTAACTCACGAGCTAGAG-3'   |
| gr45 | 5'-GGAAGCTTCTGGAACAAGTCACAGATCAAG-3'   |
| gr46 | 5'-ATAAGGAGCATCCAGATTCGCAGAGAAGAG-3'   |
| gr47 | 5'-GGCATGGCTTGTGCCATCAGTATCTTAATG-3'   |
| gr48 | 5'-CAAGGTGATCAAGCTGAGAGGTTACACATC-3'   |
| gr49 | 5'-GATTAGTGGTAGGATGCTCGTCTGGAATAC-3'   |
| gr50 | 5'-CTCAAAAAGATACTACCTTTACAAAACCTCC-3'  |

---



### Supplementary Table 7

#### Clone list : Thioredoxin domain containing 5

| Clone ID   | Tissues                              |
|------------|--------------------------------------|
| 2610106K24 | Embryo10                             |
| E970033M01 | Mix 12 days embryo whole body        |
| G270135G09 | Melanocyte                           |
| I1C0028N02 | Mix blastocyst blastocyst            |
| G430009D22 | Mix B cells                          |
| G430060J19 | Mix                                  |
| G430064A07 | Mix                                  |
| G430130E14 | Mix bladder                          |
| G430009D22 | Mix B cells                          |
| G430144K16 | Mix bone marrow stroma cell          |
| G430148H04 | Mixed                                |
| L930035P06 | Mix 17.5 days embryo whole body      |
| G930005P07 | Mix mammary gland                    |
| G930026P10 | Mix mammary gland                    |
| I920161N07 | Female 17 days pregnant adult amnion |
| I920178L20 | Female 17 days pregnant adult amnion |
| I920192M05 | Female 17 days pregnant adult amnion |
| K630014G11 | Mix 13 days embryo whole body        |
| I920074E01 | Mixed                                |
| I920125D10 | Mix 17 days embryo kidney            |
| L230044D13 | F1 WHJ/whole joints                  |
| I320001F14 | Stroma cell                          |
| I320012I09 | Stroma cell                          |
| I320026H17 | Stroma cell                          |
| I420010N07 | Osteoclast-like cell                 |
| L530009D17 | Male adult lung                      |
| L530016D01 | Male adult lung                      |
| K430025C13 | Mix p28 Visual cortex                |
| K530005D13 | Mix p55 Visual cortex                |

---

|            |                                 |
|------------|---------------------------------|
| K530016B14 | Mix p55 Visual cortex           |
| K530018C12 | Mix p55 Visual cortex           |
| K530023N08 | Mix p55 Visual cortex           |
| K530030G18 | Mix p55 Visual cortex           |
| K530327B20 | Mix p55 Visual cortex           |
| L830007J18 | Tg197 WHJ/whole joints          |
| 1520402N17 | Cerebellum                      |
| 5031436P19 | Ovary & Uterus(Preg.11day)      |
| 3732421E15 | Embryo12 Lower body             |
| 4122402I07 | Embryo16 Head                   |
| 4632401M23 | Skin (Neonate0day)              |
| 5730450B01 | Embryo 8                        |
| 5730514K09 | Embryo 8                        |
| 5730514K19 | Embryo 8                        |
| 573058800  | Embryo 8                        |
| 6820443J08 | Extra ovary (embryo 12)         |
| 9530062G08 | Urine bladder                   |
| 8430414G05 | Lung (embryo16)                 |
| 9930018J01 | Vagina                          |
| 8430427C15 | Lung (embryo16)                 |
| 7420472E18 | Invitro fertilized eggs (adult) |
| 7420484N01 | Invitro fertilized eggs (adult) |
| 7420490G01 | Invitro fertilized eggs (adult) |
| C130022H24 | E16 Head                        |
| C130023C17 | E16 Head                        |
| C330041B16 | ES cells                        |
| C530021L21 | E12 spinal cord                 |
| D130084B14 | E12 spinal ganglion             |
| D830011G03 | N16 heart                       |
| C630049F15 | Hippocampus                     |
| D230036C09 | E12 eyeball                     |
| D930026A22 | E15 head                        |

---

---

|             |                                    |
|-------------|------------------------------------|
| 1110016J06  | 18-day embryo                      |
| 1110031D14  | 18-day embryo                      |
| 1110036J02  | 18-day embryo                      |
| 1190004B04  | 18-day embryo                      |
| 1190021F01  | 18-day embryo                      |
| 1190024O20  | 18-day embryo                      |
| 1190029P05  | 18-day embryo                      |
| 1190033B07  | 18-day embryo                      |
| 1190033F14  | 18-day embryo                      |
| 1190035I19  | 18-day embryo                      |
| 1200017C21  | Lung                               |
| 1.20002E+28 | Lung                               |
| 1300007G04  | Liver                              |
| 1500031D03  | Cerebellum                         |
| G370067H14  | B16 F10Y cells cytoRNA             |
| F430006O09  | mix 6 days neonate spleen          |
| 3526404H09  | Brain                              |
| 3830422A09  | Placenta+extra embryonic tissue    |
| 5730447M10  | Embryo 8                           |
| 4930580F23  | Testis                             |
| 6030453D20  | Testis (embryo 13)                 |
| C130031G18  | E16 Head                           |
| C130032N24  | E16 Head                           |
| C130075D04  | E16 Head                           |
| C730036L15  | SV40Tantigen transgenic mouse he   |
| 2210416I23  | Stomach                            |
| 2810421B12  | Embryo10+Embryo11                  |
| G270063E18  | melanocyte                         |
| B230369N19  | C.quadrigemina                     |
| B230377N14  | C.quadrigemina                     |
| G530001C22  | LPS-treated bone marrow macrophage |
| G530012G02  | LPS-treated bone marrow macrophage |

---

|            |                                    |
|------------|------------------------------------|
| G530019P04 | LPS-treated bone marrow macrophage |
| G930031O14 | mix mammary gland                  |

### Supplementary Table 8

#### Clone list : Interleukin 1 $\beta$

| Clone ID   | Tissues                                  |
|------------|------------------------------------------|
| I730030O16 | Mix                                      |
| I830007B19 | LPS-treated bone marrow macrophage       |
| I830008E04 | LPS-treated bone marrow macrophage       |
| I830083A07 | LPS-treated bone marrow macrophage       |
| 9930018N22 | Vagina                                   |
| A530081A22 | Aorta and vein                           |
| A530093O03 | Aorta and vein                           |
| D730034P15 | L10 mammary gland                        |
| G630059M03 | Male adult accessory axillary lymph node |
| 9930105H20 | Vagina                                   |
| A830023M03 | N10 Cortex                               |
| A830095G07 | N10 Cortex                               |
| F830203M10 | Activated spleen from NOD.Cz Idd3        |
| F830228K19 | Activated spleen from NOD.Cz Idd3        |

### Supplementary Table 9

#### Clone list : Interleukin 1 family 6

| Clone ID   | Tissues |
|------------|---------|
| 2310031E05 | Tongue  |
| 2310031C03 | Tongue  |
| 2310057B02 | Tongue  |
| 2310044C14 | Tongue  |
| 2310035D21 | Tongue  |
| 2310021N03 | Tongue  |
| 2310016P06 | Tongue  |
| 2210402B18 | Stomach |
| 2210038G14 | Stomach |
| 2210010P21 | Stomach |

---

|            |        |
|------------|--------|
| 2310005M13 | Tongue |
| 2310068N20 | Tongue |
| 2310065E02 | Tongue |
| 2310005L09 | Tongue |
| 9130022H20 | Cecum  |
| 2310079C01 | Tongue |
| 2300006P11 | Tongue |

---

**Supplementary Table 10**

**Clone list : glutamine-rich hypothetical protein**

---

| Clone ID   | Tissues                   |
|------------|---------------------------|
| F430103N05 | Mix 6 days neonate spleen |
| 4930451K03 | Testis                    |
| K330313E13 | Mix p24 Visual cortex     |
| 9530074K22 | Urine bladder             |
| 4930517C18 | Testis                    |
| A730052P22 | N7 Cerebellum             |
| 7330424G03 | Adrenal gland (adult)     |
| 9430060J09 | E12 Upper body            |
| 4933436H09 | Testis                    |
| K430360E06 | Mix p28 Visual cortex     |
| 9430097N23 | E12 Upper body            |
| 4930550A07 | Testis                    |
| 4930521G01 | Testis                    |

---

## Figure legends

**Figure S1:** Exon structures of known transcript and of sequenced alternative splice variant candidates in Thioredoxin domain containing 5 locus. Known transcript (105245) is represented at top. Boxes and lines represent exons and introns, respectively. Filled boxes indicate the region of protein-coding sequence. Squares with dot lines indicate genuine alternative splice variants. Positions of domains predicted by InterPro and SOSUI are indicated with double-headed arrows.

Figure S2: Exon profiling of IL-1F6 (a) Exon structure of a known clone (54448) in IL-1F6 locus. Boxes and lines represent exons and introns, respectively. Filled boxes indicate the region of protein-coding sequence. Solid line on the exon 4 indicates the position of probe 5. (b) Typical result of RecA-mediated exon profiling method. The probe x was designed on the exon 4. Circles (O) and crosses (X) indicate presence and absence of the triple-stranded DNA (triplex) formation, respectively. Clone 1 and Clone 10 indicated lack of the sequence corresponding to the probe designed on exon4.

Figure S3: Exon profiling of glutamine rich hypothetical protein (a) Exon structures of 8 known clones in glutamine rich hypothetical protein locus. Boxes and lines represent exons and introns, respectively. Filled boxes indicate the region of protein-coding sequence. Solid line on the exon 17 indicates the position of probe. (b) Typical result of RecA-mediated exon profiling method. The probe x was designed on the exon 17. Circles (O) and crosses (X) indicate presence and absence of the triple-stranded DNA (triplex) formation, respectively. Only clone 1, 3, 6, 10 were suggested to contain the sequence corresponding to the probe 5. (c) Exon structures of alternative splice candidate transcripts. Open boxes indicate novel splice variants.
